# Supplementary material for: The amyloid-β degradation intermediate Aβ34 is pericyte-associated and reduced in brain capillaries of patients with Alzheimer’s disease
Source: PubMed Central journal article supplement (PMC6892233; doi:10.1186/s40478-019-0846-8), 2019-12-03
Supplement: 40478_2019_846_MOESM1_ESM.pdf [file 40478_2019_846_MOESM1_ESM.pdf]

**Additional File 1 - Primary antibodies used in immunofluorescence (IF), immunocytochemistry (ICC) and western blot (WB)**

| Target         | Host   | Clone      | Source            | Product number | Dilution*                            |
|----------------|--------|------------|-------------------|----------------|--------------------------------------|
| A $\beta$ 34   | Mouse  | -          | Multhaup Lab [29] | -              | 1:400                                |
| PDGFR- $\beta$ | Goat   | Polyclonal | R&D Systems       | AF385          | 1:250 (IF), 1:200 (ICC), 1:2000 (WB) |
| Collagen IV    | Rabbit | Polyclonal | Abcam             | ab6586         | 1:500                                |
| CD31           | Rabbit | Polyclonal | Abcam             | ab32457        | 1:200                                |
| GFAP           | Rabbit | Polyclonal | Sigma Aldrich     | G9269          | 1:50                                 |
| Amyloid        | Mouse  | W02        | Sigma Aldrich     | MABN10         | 1:800                                |
| Tau            | Mouse  | AT8        | ThermoFischer     | MN1020         | 1:500                                |
| LRP1           | Rabbit | EPR3724    | Abcam             | ab92544        | 1:200 (ICC), 1:2000 (WB)             |
| BACE1          | Rabbit | D10E5      | Cell Signaling    | 5606T          | 1:200 (ICC), 1:1000 (WB)             |

\* Dilutions were reported based on 1 mg/ml antibody stock solution
