# Supplementary material for: The amyloid-β degradation intermediate Aβ34 is pericyte-associated and reduced in brain capillaries of patients with Alzheimer’s disease
Source: PubMed Central journal article supplement (PMC6892233; doi:10.1186/s40478-019-0846-8), 2019-12-03
Supplement: 40478_2019_846_MOESM4_ESM.pdf [file 40478_2019_846_MOESM4_ESM.pdf]

**Additional File 4 - Cerebral Amyloid Angiopathy (CAA) quantification**

| <b>Brain Region: Hippocampus</b> |              |               |             |
|----------------------------------|--------------|---------------|-------------|
| <b>Braak Stage</b>               | <b>I-II</b>  | <b>III-IV</b> | <b>V-VI</b> |
| <b>CAA Score<sup>a</sup></b>     | Grade 0 (3)  | Grade 0 (4)   | Grade 0 (4) |
|                                  | Grade 1 (3)  | Grade 1 (0)   | Grade 1 (0) |
|                                  | Grade 2 (1)  | Grade 2 (5)   | Grade 2 (0) |
|                                  | Grade 3 (0)  | Grade 3 (1)   | Grade 3 (2) |
|                                  | Grade 4 (0)  | Grade 4 (0)   | Grade 4 (2) |
| <b>Brain Region: Cortex</b>      |              |               |             |
| <b>Braak Stage</b>               | <b>I-II</b>  | <b>III-IV</b> | <b>V-VI</b> |
| <b>CAA Score</b>                 | Grade 0 (10) | Grade 0 (7)   | Grade 0 (5) |
|                                  | Grade 1 (1)  | Grade 1 (2)   | Grade 1 (0) |
|                                  | Grade 2 (1)  | Grade 2 (4)   | Grade 2 (3) |
|                                  | Grade 3 (0)  | Grade 3 (0)   | Grade 3 (2) |
|                                  | Grade 4 (0)  | Grade 4 (0)   | Grade 4 (0) |

a: Capillary CAA was absent in the sample set. CAA scores show the prevalence and severity of CAA-laden arteries. CAA Score: Grade 0 = none, Grade 1 = mild, Grade 2 = moderate, Grade 3 = severe, Grade 4 = very severe (Adapted from Arvanitakis Z, Leurgans SE, Wang Z, Wilson RS, Bennett DA, Schneider JA (2011) Cerebral amyloid angiopathy pathology and cognitive domains in older persons. *Annals of Neurology* 69:320–327. doi: 10.1002/ana.22112)
