# Supplementary material for: The amyloid-β degradation intermediate Aβ34 is pericyte-associated and reduced in brain capillaries of patients with Alzheimer’s disease
Source: Springer Nature journal article supplement (doi:10.1186/s40478-019-0846-8), 2019-12-01
Supplement: MOESM3 [file 25667014]

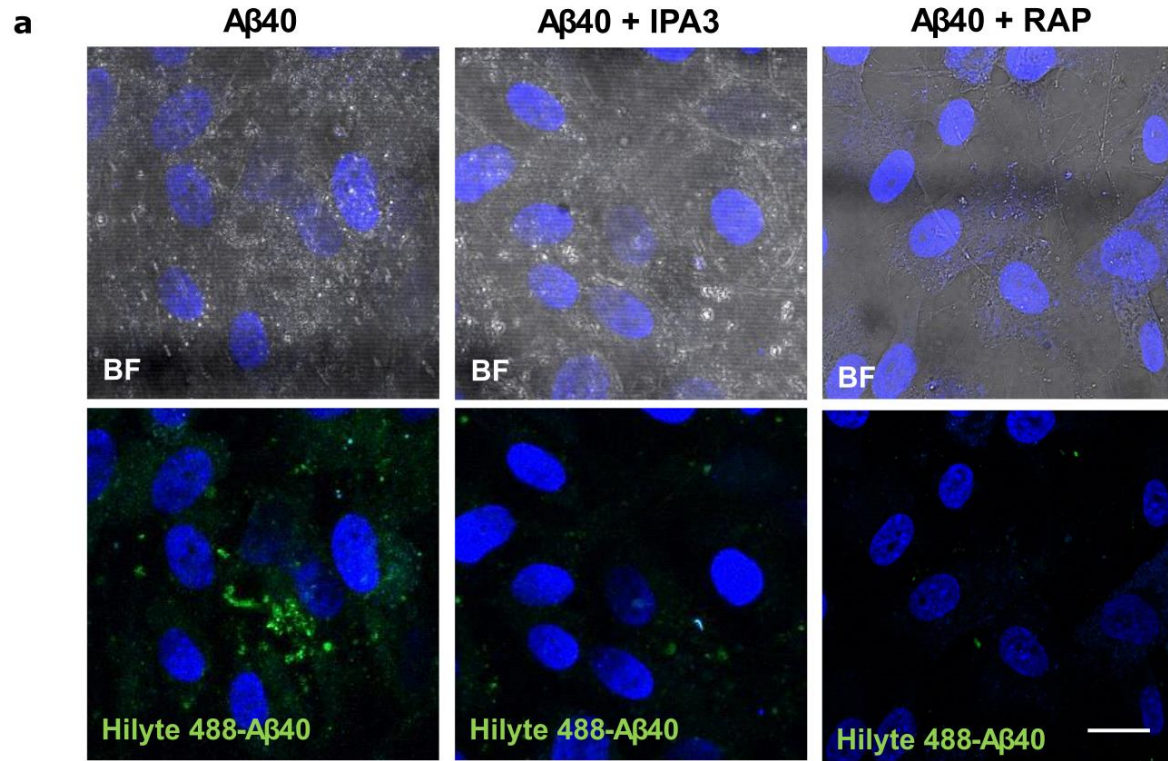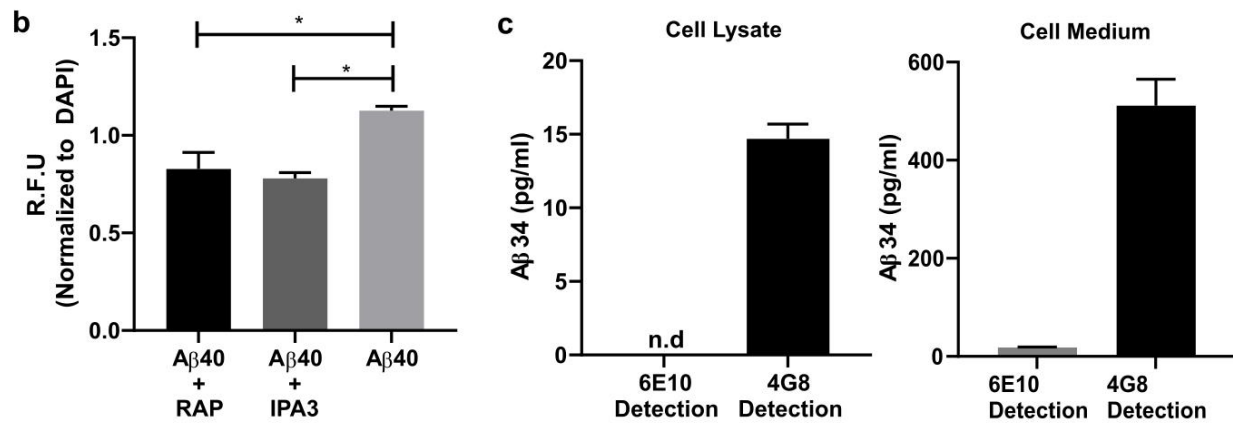

### Additional File 3

**a**) Immunocytochemistry-based assay of fluorescently-labeled A $\beta$ 40 (Hilyte 488-A $\beta$ 40) uptake of pericytes upon IPA3 or RAP treatment. (Scale bar 10  $\mu$ m). **b**) 96-well plate assay of fluorescently-labeled A $\beta$ 40 uptake of pericytes upon IPA3 or RAP treatment. **c**) Treatment of pericytes with mouse A $\beta$ 40 and detection of A $\beta$ 34 with a human specific (6E10) or mid-domain (4G8) antibody which can detect both mouse and human A $\beta$ .
